# Supplementary material for: Soil bacterial and fungal community dynamics in relation to Panax notoginseng death rate in a continuous cropping system
Source: PubMed Central journal article supplement (PMC4994099; doi:10.1038/srep31802), 2016-08-23
Supplement: srep31802-s1.pdf [file srep31802-s1.pdf]

1 **Soil bacterial and fungal community dynamics in relation to *Panax notoginseng***  
2 **death rate in a continuous cropping system**

3 **Linlin Dong<sup>1</sup>, Jiang Xu<sup>1</sup>, Guangquan Feng<sup>2</sup>, Xiwen Li<sup>1</sup>, Shilin Chen<sup>1\*</sup>**

4 <sup>1</sup> Institute of Chinese Materia Medica, China Academy of Chinese Medical Sciences,  
5 Beijing 100700, China.

6 <sup>2</sup> Wenshan Prefecture Sanqi Science and Technology Research Institute, Sanqi  
7 Research department, Yunnan province 663000, China.

8 \* Correspondence author: Shilin Chen

9 Tel: 0086-10- 57203877; Fax: 0086-10- 62899776; E-mail: slchen@icmm.ac.cn

## 10 **Materials and methods**

### 11 **Separation and identification of pathogenic strains**

12 Soil samples (1 g) from the rhizosphere of notoginseng infected with root rot were  
13 diluted 1000 times, and the samples (100 µL) were used to screen pathogenic strains  
14 using acidifier potato glucose medium (APDA)<sup>1</sup>. The separated and purified strains  
15 were inoculated on the APDA at 25 °C for 3 d for identification.

16 Morphological identification was confirmed according to the description of Wei<sup>1</sup>.  
17 Molecular identification of the selected strain was performed by the amplification of  
18 18S rRNA with universal primers NS1 and NS6<sup>2</sup>. Genomic DNA of a single enriched  
19 strain was extracted using the cetyl trimethyl ammonium bromide (CTAB) method<sup>3</sup>.  
20 PCR was conducted in a 25 µL reaction mixture with *Taq* DNA recombinant  
21 polymerase (TaKaRa Bio.). Negative controls (no template DNA) were included to  
22 check for primer and sample DNA contamination. The sequences were analyzed on a  
23 3730 XL sequencer (Applied Biosystems, Foster city, CA, USA). The generated  
24 sequence was compared with published 18S rRNA sequences on the National Center  
25 for Biotechnology Information web site using the BLAST query search engine  
26 (<http://www.ncbi.nlm.gov/blast>). The sequences produced in this study have been  
27 submitted to GenBank with accession numbers (KX086739). Neighbor-joining (NJ)  
28 trees were constructed in MEGA v6.0 software to generate Kimura 2-parameter (K2P)  
29 distance matrices for each sequence following standard parameters.

30

### 31 **Supplementary information**

32 **Pathogenicity assays**

33 Pathogenicity of the identified strains was tested using pot experiments in our  
34 plantation. Three years of notoginseng seedlings were cultivated in the pots  
35 containing 1,000 g of heat-sterilized soil. The 10 mL cultures ( $2.0 \times 10^6$  cfu mL<sup>-1</sup>) of  
36 strains were inoculated into the pots after transplanting for one month. The inactivated  
37 cultures were also inoculated as the control. Fifty replicate seedlings were used. The  
38 symptoms of notoginseng seedlings were analyzed after inoculation for 45 d. Disease  
39 severity was assessed with a 0 to 3 visual scale, where 0=no symptoms, 1=light or  
40 moderate discoloration in the root, 2=severe discoloration or rot in the root, and  
41 3=dead seedlings. The numbers of diseased seedlings were calculated according to the  
42 disease severity. To confirm the infection of notoginseng plants by strains, isolations  
43 were made from a diseased plant with symptoms.

44

45 **Quantitative PCR of pathogenic taxa**

46 To verify the relationship between the relative abundance of key pathogenic taxa and  
47 notoginseng death rate, the relative abundance of *Fusarium* was calculated using the  
48 ITS-Fu-F/ITS-Fu-R<sup>4</sup> by quantitative PCR according to the description of Rousk *et al.*<sup>5</sup>.

49 **Fig. S1**

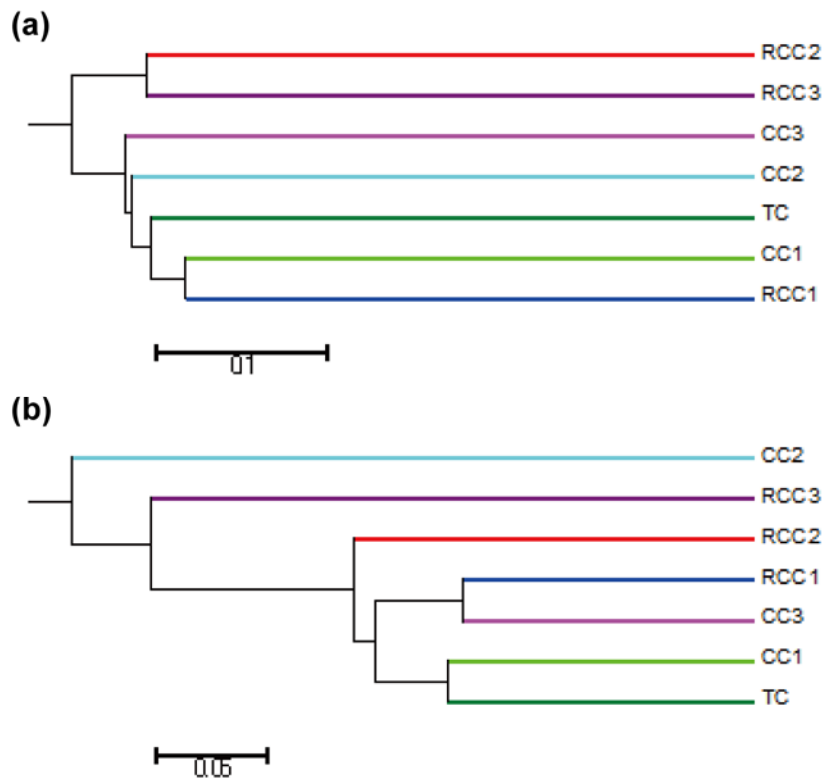

50

51 **Fig. S1 Dendrogram of microbial communities in notoginseng cropping and**

52 **traditional cropping soils. a)** Clustering showed the relatedness of samples that were

53 separated using Bray-Curtis distances of classified 16S rRNA, and **b)** 18S rRNA gene

54 sequences, respectively. TC, traditional cropping; CC1, CC2 and CC3 indicated

55 continuous cropping for 1, 2 and 3 years, respectively; RCC1, RCC2 and RCC3

56 represented replanted continuous cropping systems for 1, 2 and 3 years, respectively.

57 Data were means of  $n = 3$ .

58

(a)

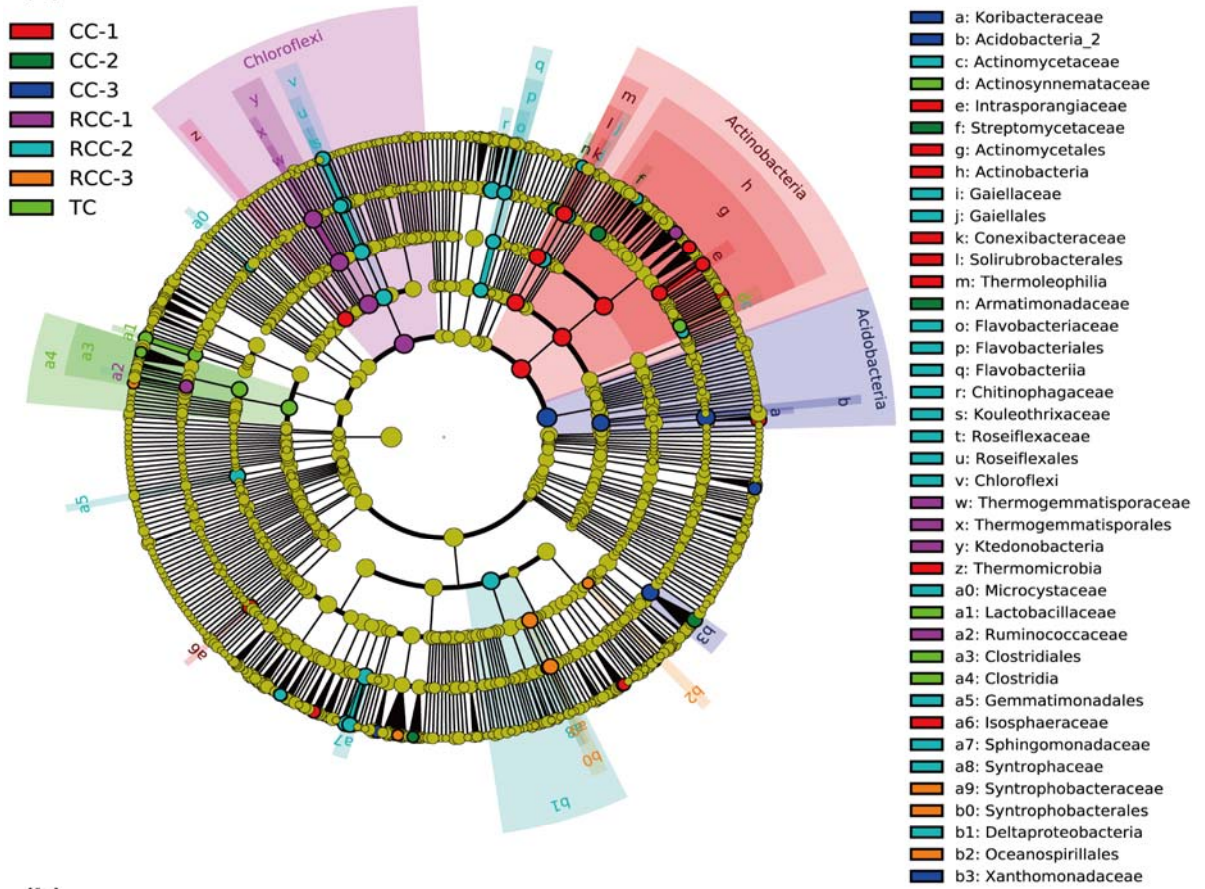

(b)

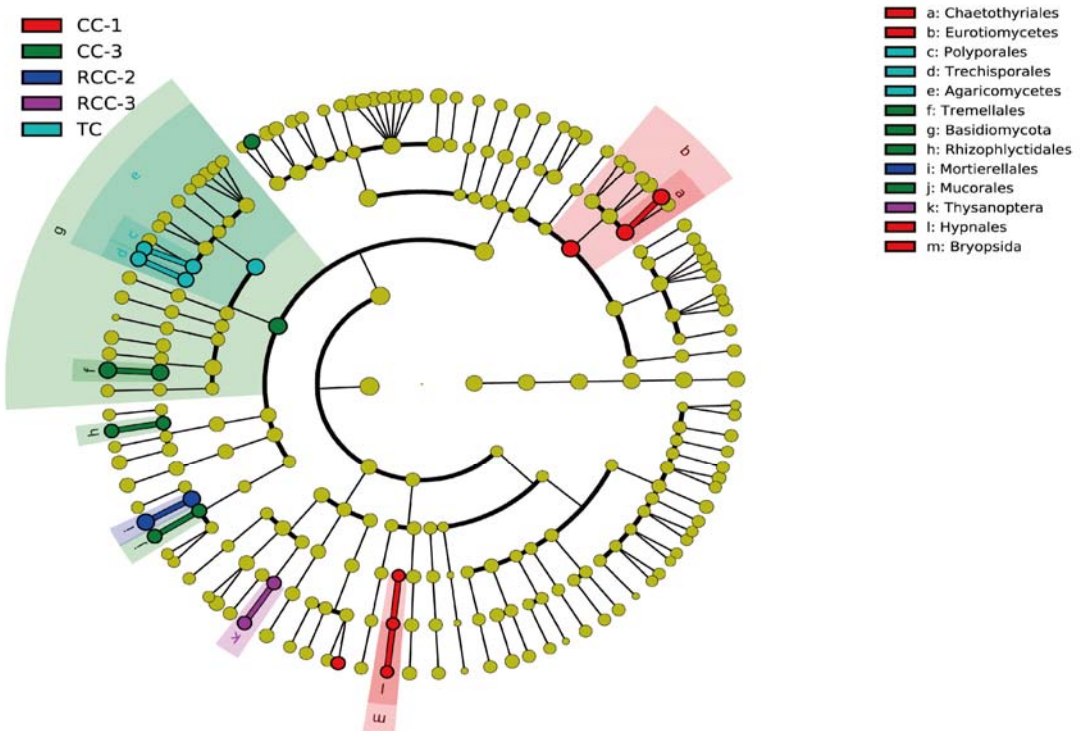

61 **Fig.S2 LEfSe results on soil microbial communities. a)** Taxonomic cladogram  
62 obtained from LEfSe of 16S OTU. **b)** Taxonomic cladogram obtained from LEfSe of  
63 18S OTU. The cladograms reported the taxa (highlighted by small circles and shading)  
64 showing different abundance values in the soils of TC, CC and RCC. Yellow circles  
65 represented non-significant differences in abundance between samples of those  
66 particular taxa. Each circle's diameter was proportional to the taxon's abundance. TC  
67 indicated traditional cropping (control). CC1, CC2 and CC3 indicated continuous  
68 cropping for 1, 2 and 3 years, respectively; RCC1, RCC2 and RCC3 represented  
69 replanted continuous cropping systems for 1, 2 and 3 years, respectively. Data were  
70 means of  $n = 3$ .

71

72 **Fig.S3**

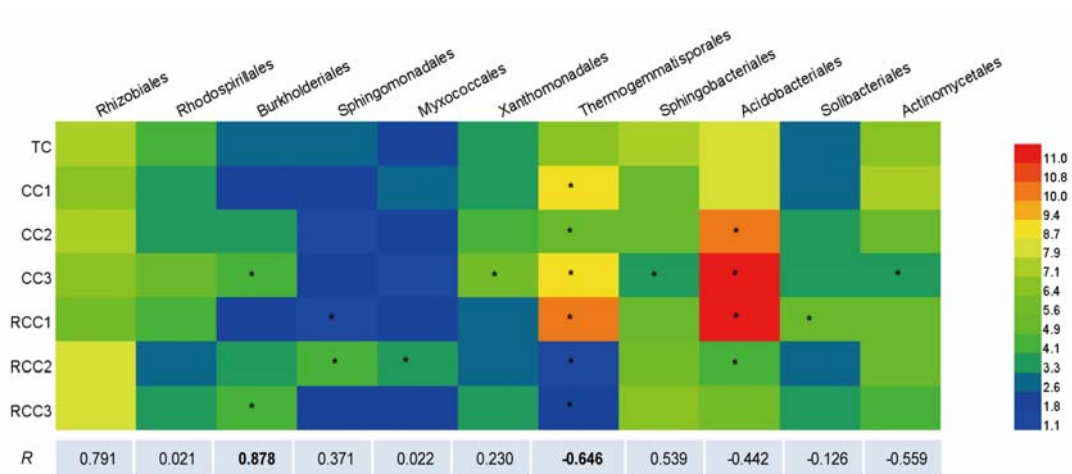

73

74 **Fig.S3 The relative abundance of the dominant bacterial taxa (>1%) and their**

75 **Pearson's correlation coefficients with notoginseng death rates. TC indicated**

76 **traditional cropping (control). CC1, CC2 and CC3 indicated continuous cropping for**

77 **1, 2 and 3 years, respectively; RCC1, RCC2 and RCC3 represented replanted**

78 **continuous cropping systems for 1, 2 and 3 years, respectively. Data were means of  $n$**

79 **= 3; asterisks denoted significant differences between the TC and notoginseng**

80 **cultivation in the relative abundance of soil bacterial groups at  $P < 0.05$ . Significant**

81 **correlation coefficients were noted in bold font where  $P < 0.05$ .**

82

83 Fig.S4

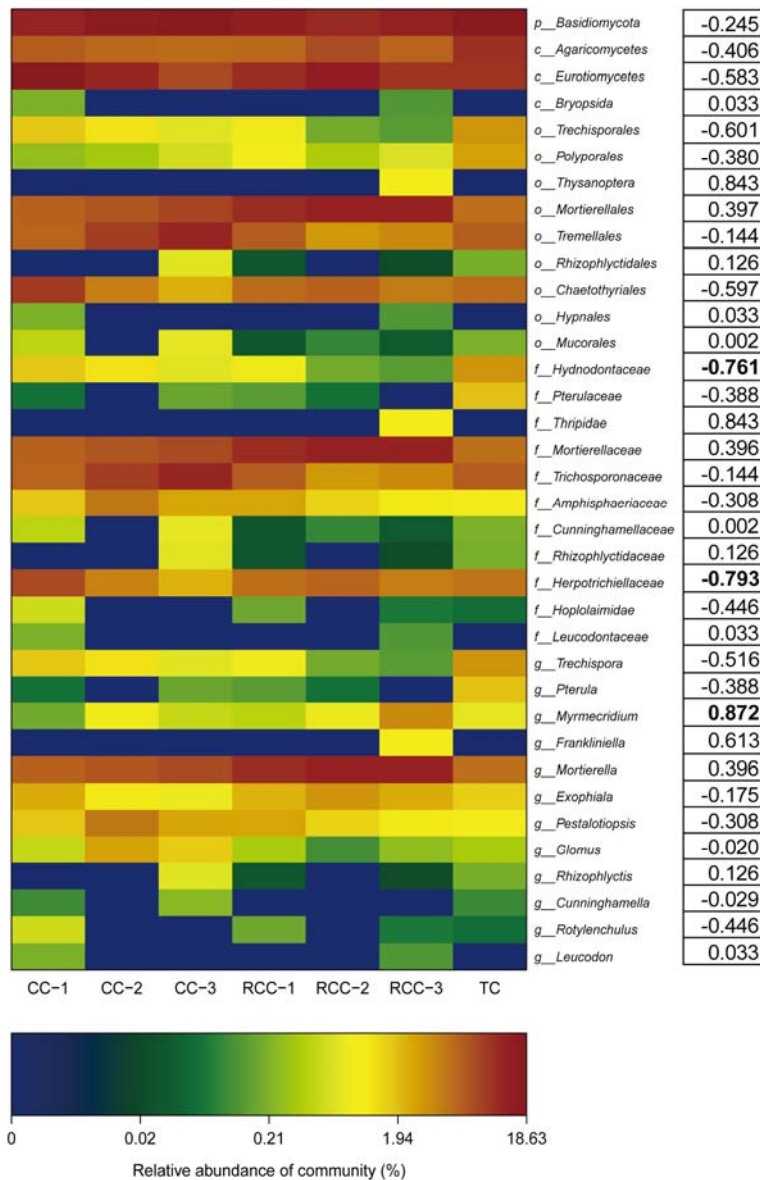

84

85 **Fig.S4 The relative abundance of the fungal taxa detected by LEfSe as**  
 86 **biomarkers and their Pearson's correlation coefficients with notoginseng death**  
 87 **rates.** TC indicated traditional cropping (control). CC1, CC2 and CC3 indicated  
 88 continuous cropping for 1, 2 and 3 years, respectively; RCC1, RCC2 and RCC3  
 89 represented replanted continuous cropping systems for 1, 2 and 3 years, respectively.  
 90 Data were mean values of  $n = 3$ ; significant correlation coefficients were noted in  
 91 bold font where  $P < 0.05$ .

92



93

94 **Fig.S5**

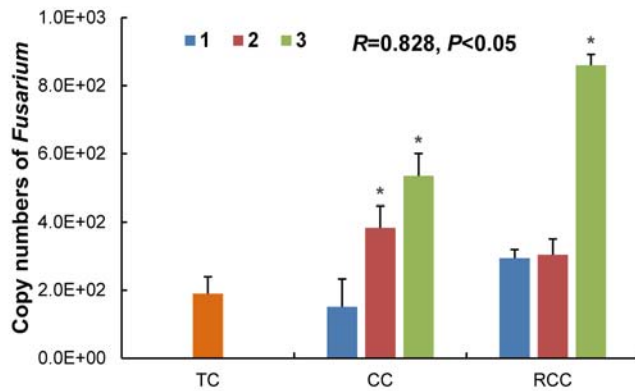

95

96 **Fig.S5 The abundance of *Fusarium* in the soils.** TC indicated traditional cropping  
97 (control). CC and RCC indicated continuous cropping and replanted continuous  
98 cropping, respectively. *R* presented the relationship between the abundance of  
99 *Fusarium* and notoginseng death rates based on the Pearson's correlation analysis. All  
100 values were indicated as the mean  $\pm$  SE ( $n = 3$ ); asterisks denoted significant  
101 differences between the traditional cropping and notoginseng cultivation in the  
102 abundance of *Fusarium* at  $P < 0.05$ .

103

104 **Fig. S6**

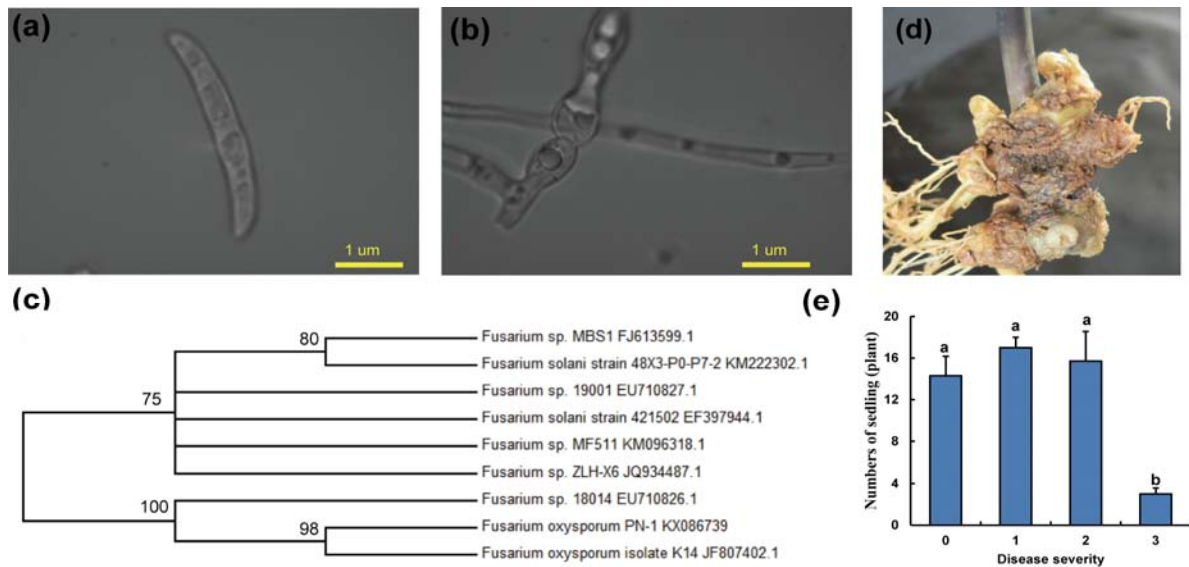

105

106 **Fig. S6 The pathogenicity analysis of strains screened from soil. a)** Conidium and

107 **b)** chamydospore of notoginseng root-knot pathogenic strain. **c)** The relationships

108 among strains (KX086739) and published 18S rDNA sequences (GenBank accession

109 numbers were presented in parentheses). **d)** The symptoms of root-rot caused by

110 separated strain in the notoginseng (There were no symptoms of notoginseng root-rot

111 in the control). **e)** The ratio of disease severity in the notoginseng after inoculation.

112 Neighbor-joining (NJ) trees were constructed in MEGA v6.0 to generate Kimura

113 2-parameter (K2P) distance matrices for each sequence following standard parameters.

114 The numbers at the branch knots were bootstrap values based on 1000 resamplings for

115 the maximum likelihood. Only bootstrap values greater than 75% were shown. All

116 values were indicated as the mean  $\pm$  SE ( $n = 3$ ). Bars with different letters denoted

117 significant differences at  $\alpha = 0.05$ . 0, 1, 2, and 3 represented no symptoms, light or

118 moderate discoloration in the root, severe discoloration or rot in the root, and dead

119 seedlings after inoculation.

120 Fig.S7

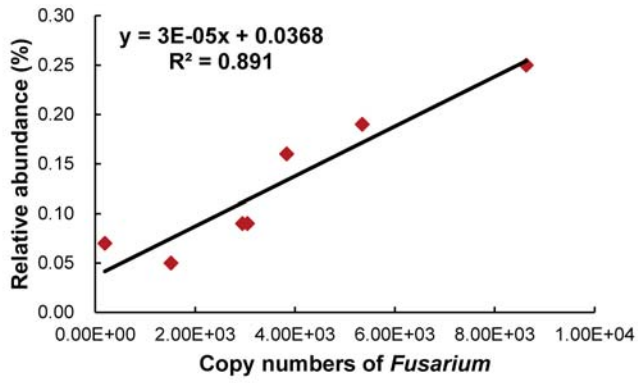

121

122 Fig. S7 Linear regression of the relationship between relative abundance (%) of

123 *Fusarium* from high-throughput sequencing data and qPCR analysis. All values

124 were indicated as the mean of  $n = 3$ .

125

126 **Fig. S8**

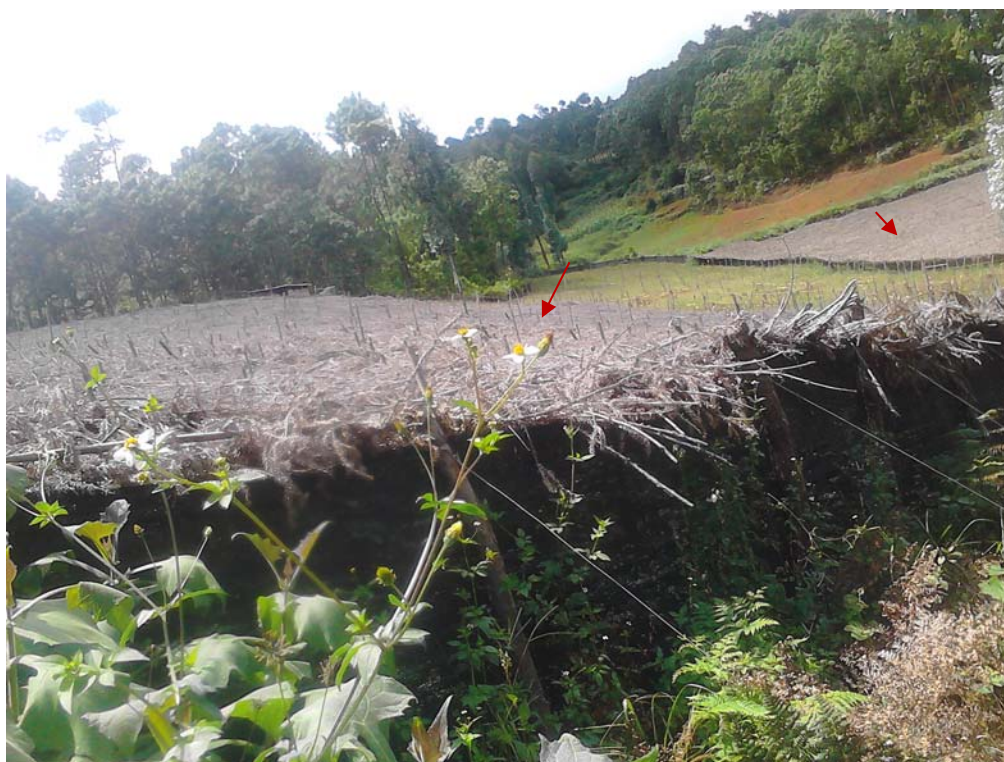

127

128 **Fig. S8 The cultivation pattern of notoginseng in China. Red arrows represented**  
129 notoginseng field station.

130

131

**Table S1. The death rates (%) of notoginseng seedlings every year.**

| Cropping systems | 2002       | 2003        | 2004        | 2005        | 2006        | 2010       | 2011        | 2012        |
|------------------|------------|-------------|-------------|-------------|-------------|------------|-------------|-------------|
| TC               | -          | -           | -           | -           | -           | -          | -           | -           |
| CC1              | -          | -           | -           | -           | -           | -          | -           | <b>2.0</b>  |
| CC2              | -          | -           | -           | -           | -           | -          | <b>1.5</b>  | <b>14.4</b> |
| CC3              | -          | -           | -           | -           | -           | <b>1.3</b> | <b>15.2</b> | <b>34.3</b> |
| RCC1             | -          | -           | <b>3.4</b>  | <b>16.9</b> | <b>39.7</b> | -          | -           | <b>2.6</b>  |
| RCC2             | -          | <b>1.8</b>  | <b>8.6</b>  | <b>29.2</b> | -           | -          | <b>2.7</b>  | <b>39.4</b> |
| RCC3             | <b>2.1</b> | <b>14.2</b> | <b>35.2</b> | -           | -           | <b>3.8</b> | <b>35.2</b> | <b>81.2</b> |

132

133 TC indicated traditional cropping (control); CC1, CC2 and CC3 indicated continuous  
 134 cropping for 1, 2 and 3 years, respectively; RCC1, RCC2 and RCC3 represented  
 135 replanted continuous cropping for 1, 2 and 3 years, respectively. – indicated no data.

136 Data were presented as the mean of  $n = 3$ .

137

138 **Table S2. Numbers of bacterial and fungal sequences, derived OTUs and average**  
 139 **length in each sample**

| Samples | Bacterial community |      |                | Fungal community |      |                |
|---------|---------------------|------|----------------|------------------|------|----------------|
|         | Sequences           | OTUs | Average Length | Sequences        | OTUs | Average Length |
| TC1     | 1849                | 1416 | 220            | 2379             | 855  | 243            |
| TC2     | 2852                | 1960 | 220            | 1224             | 560  | 225            |
| TC3     | 2197                | 1604 | 221            | 1073             | 476  | 234            |
| CC1-1   | 998                 | 794  | 231            | 596              | 323  | 227            |
| CC1-2   | 1358                | 1042 | 226            | 1610             | 593  | 238            |
| CC1-3   | 970                 | 807  | 209            | 1314             | 518  | 247            |
| CC2-1   | 2097                | 1656 | 219            | 300              | 185  | 220            |
| CC2-2   | 2284                | 1716 | 219            | 507              | 287  | 231            |
| CC2-3   | 988                 | 805  | 205            | 737              | 405  | 238            |
| CC3-1   | 1552                | 1167 | 216            | 958              | 404  | 232            |
| CC3-2   | 1328                | 1030 | 211            | 1747             | 638  | 243            |
| CC3-3   | 1941                | 1466 | 222            | 1576             | 629  | 245            |
| RCC1-1  | 917                 | 745  | 218            | 481              | 304  | 226            |
| RCC1-2  | 1432                | 1131 | 215            | 1242             | 536  | 228            |
| RCC1-3  | 855                 | 712  | 220            | 948              | 494  | 240            |
| RCC2-1  | 2840                | 2061 | 224            | 871              | 455  | 222            |
| RCC2-2  | 2157                | 1695 | 225            | 2089             | 696  | 254            |
| RCC2-3  | 2079                | 1652 | 222            | 1417             | 643  | 247            |
| RCC3-1  | 2447                | 1841 | 219            | 3374             | 969  | 245            |
| RCC3-2  | 2325                | 1752 | 217            | 2554             | 768  | 241            |
| RCC3-3  | 2906                | 2101 | 206            | 2418             | 787  | 231            |

140 TC indicated traditional cropping (control); CC1, CC2 and CC3 indicated continuous  
 141 cropping for 1, 2 and 3 years, respectively; RCC1, RCC2 and RCC3 represented  
 142 replanted continuous cropping for 1, 2 and 3 years, respectively. -1,-2 and -3  
 143 presented three replicates.

144

145

**Table S3. Relative abundances (%) of rare bacterial phyla**

| Phyla           | TC        | CC1        | CC2        | CC3        | RCC1       | RCC2       | RCC3       |
|-----------------|-----------|------------|------------|------------|------------|------------|------------|
| WPS-2           | 1.34±0.12 | 1.22±0.26  | 0.74±0.23* | 0.95±0.12* | 1.29±0.21  | 0.12±0.23* | 0.22±0.12* |
| TM7             | 0.80±0.13 | 0.78±0.13  | 1.14±0.15  | 0.41±0.07* | 0.31±0.12* | 0.56±0.13  | 0.70±0.23  |
| Armatimonadetes | 0.92±0.14 | 0.72±0.16  | 0.81±0.10  | 0.45±0.03* | 0.69±0.15  | 1.15±0.10  | 0.94±0.22  |
| Nitrospirae     | 0.48±0.12 | 0.36±0.09  | 0.59±0.12  | 0.76±0.15  | 0.55±0.11  | 0.77±0.04* | 0.74±0.04* |
| Cyanobacteria   | 1.04±0.27 | 0.58±0.13  | 1.58±0.28  | 1.31±0.19  | 1.02±0.16  | 1.15±0.02  | 1.67±0.22* |
| Chlorobi        | 0.27±0.11 | 0.15±0.04  | 0.19±0.02  | 0.14±0.07  | 0.08±0.04* | 0.08±0.03* | 0.19±0.08  |
| Fibrobacteres   | 0.07±0.01 | 0.06±0.03  | 0.04±0.03  | 0.00±0.00* | 0.00±0.00* | 0.05±0.02  | 0.00±0.00* |
| TM6             | 0.29±0.08 | 0.64±0.18* | 0.40±0.11  | 0.31±0.10  | 0.20±0.03  | 0.30±0.10  | 0.17±0.08  |
| Tenericutes     | 0.15±0.09 | 0.08±0.04  | 0.06±0.02  | 0.06±0.01  | 0.02±0.02  | 0.14±0.08  | 0.12±0.08  |
| Elusimicrobia   | 0.48±0.17 | 0.47±0.11  | 0.25±0.14  | 0.19±0.09  | 0.25±0.09  | 0.25±0.10  | 0.37±0.05  |

147 TC indicated traditional cropping (control); CC1, CC2 and CC3 indicated continuous  
148 cropping for 1, 2 and 3 years, respectively; RCC1, RCC2 and RCC3 represented  
149 replanted continuous cropping for 1, 2 and 3 years, respectively. Their average  
150 relative abundances were less than 0.6% in the control and treatments. Data were  
151 presented as the mean  $\pm$  SE of  $n = 3$ , and asterisks denoted significant differences  
152 between the traditional cropping and notoginseng cultivation in the relative abundance  
153 of bacterial groups at  $P < 0.05$ .

154

155 **Table S4. Relative abundances of the major taxa of rare fungal groups at the**

156 **order level**

| Taxa                | TC        | CC1        | CC2        | CC3        | RCC1       | RCC2       | RCC3       |
|---------------------|-----------|------------|------------|------------|------------|------------|------------|
| Blastocladales      | 0.72±0.20 | 0.58±0.26  | 0.25±0.16* | 0.50±0.04  | 0.33±0.17  | 0.51±0.21  | 0.36±0.08* |
| Onygenales          | 0.26±0.14 | 0.65±0.08* | 0.42±0.14  | 0.37±0.08  | 0.37±0.08  | 0.61±0.18  | 0.74±0.22* |
| Ostropales          | 0.33±0.15 | 0.39±0.07  | 0.11±0.06* | 0.10±0.05* | 0.26±0.15  | 0.16±0.03  | 0.08±0.00* |
| Helotiales          | 1.33±0.13 | 2.69±0.67* | 3.36±1.18* | 2.51±0.53* | 2.63±1.22  | 0.00±0.00* | 0.00±0.00* |
| Meliolales          | 0.55±0.07 | 0.51±0.14  | 0.18±0.12* | 0.57±0.03  | 0.21±0.11* | 0.40±0.09  | 0.45±0.07  |
| Boletales           | 1.95±0.61 | 0.50±0.18* | 0.36±0.20* | 0.57±0.06* | 0.50±0.13* | 0.44±0.16* | 0.30±0.18* |
| Mucorales           | 0.89±0.44 | 1.06±0.11  | 0.83±0.47  | 1.56±0.71  | 0.87±0.10  | 0.38±0.08  | 0.51±0.25  |
| Glomerales          | 0.22±0.05 | 0.09±0.05  | 0.51±0.32  | 0.16±0.09  | 0.30±0.27  | 0.46±0.22  | 0.49±0.26  |
| Cystofilobasidiales | 0.47±0.20 | 0.55±0.22  | 0.63±0.12  | 1.05±0.25  | 0.71±0.35  | 0.48±0.07  | 1.83±1.43  |
| Kickxellales        | 0.22±0.09 | 0.13±0.07  | 0.16±0.08  | 0.08±0.06  | 0.32±0.06  | 0.29±0.09  | 0.35±0.17  |
| Pyxidiophorales     | 0.20±0.07 | 0.10±0.10  | 0.42±0.14  | 0.14±0.08  | 0.12±0.07  | 0.17±0.13  | 0.13±0.06  |
| Orbiliales          | 0.18±0.06 | 0.24±0.04  | 0.13±0.13  | 0.21±0.02  | 0.21±0.21  | 0.35±0.28  | 0.12±0.08  |
| Magnaporthales      | 0.16±0.02 | 0.10±0.03  | 0.27±0.04* | 0.10±0.05  | 0.16±0.03  | 0.18±0.10  | 0.20±0.02  |
| Ophiostomatales     | 0.10±0.06 | 0.05±0.02  | 0.31±0.19  | 0.02±0.02  | 0.14±0.07  | 0.09±0.09  | 0.11±0.02  |
| Mortierellales      | 0.19±0.09 | 0.47±0.08  | 0.11±0.11  | 0.29±0.22  | 0.19±0.02  | 0.17±0.09  | 0.21±0.05  |
| Chytridiales        | 0.06±0.03 | 0.05±0.05  | 0.11±0.11  | 0.19±0.09  | 0.07±0.06  | 0.13±0.07  | 0.05±0.05  |
| Dothideales         | 0.14±0.05 | 0.05±0.02* | 0.11±0.11  | 0.15±0.03  | 0.06±0.03  | 0.09±0.06  | 0.09±0.02  |
| Sporidiobolales     | 0.23±0.13 | 0.08±0.05  | 0.20±0.14  | 0.18±0.07  | 0.27±0.11  | 0.16±0.09  | 0.11±0.04  |
| Microbotryales      | 0.18±0.06 | 0.08±0.05  | 0.09±0.09  | 0.17±0.14  | 0.31±0.18  | 0.12±0.07  | 0.09±0.09  |
| Sebacinales         | 0.04±0.04 | 0.02±0.02  | 0.20±0.11  | 0.04±0.04  | 0.04±0.03  | 0.23±0.10* | 0.00±0.00  |
| Erysiphales         | 0.13±0.02 | 0.07±0.04  | 0.07±0.06  | 0.10±0.08  | 0.17±0.13  | 0.00±0.00* | 0.06±0.04  |

157 TC indicated traditional cropping; CC1, CC2 and CC3, respectively indicated continuous  
 158 cropping for 1, 2 and 3 years; RCC1, RCC2 and RCC3 represented replanted continuous  
 159 cropping for 1, 2 and 3 years, respectively, after rotation. Their average relative abundances  
 160 were less than 0.5% in the control and treatments. Data were presented as the mean ± SE of *n*  
 161 = 3, and asterisks denoted significant differences between the traditional cropping and  
 162 notoginseng cultivation in the relative abundance of fungal groups at *P* < 0.05.



163 **Table S5. The relative abundance of *Fusarium* and *Phoma*, and their Pearson's**  
 164 **correlation coefficients with notoginseng death rates**

| 165 | Treatments | <i>Fusarium</i> | <i>Phoma</i> |
|-----|------------|-----------------|--------------|
| 166 | TC         | 0.49±0.03       | 0.19±0.01    |
| 167 | CC1        | 0.49±0.02       | 0.18±0.02    |
| 168 | CC2        | 0.60±0.01*      | 0.16±0.01    |
| 169 | CC3        | 0.70±0.02*      | 0.18±0.03    |
| 170 | RCC1       | 0.51±0.03       | 0.16±0.01    |
| 171 | RCC2       | 0.44±0.02       | 0.17±0.02    |
| 172 | RCC3       | 0.83±0.03*      | 0.25±0.02*   |
|     | <b>R</b>   | <b>0.794</b>    | <b>0.875</b> |

173 CC1, CC2 and CC3 indicated continuous cropping for 1, 2 and 3 years, respectively ;  
 174 RCC1, RCC2 and RCC3 represented replanted continuous cropping for 1, 2 and 3  
 175 years, respectively. Data were presented as the mean ± SE of  $n = 3$ ; asterisks denoted  
 176 significant differences between the traditional cropping and notoginseng cultivation in  
 177 the relative abundance of fungal genera at  $P < 0.05$ . Black body denoted significant  
 178 differences between the genera and notoginseng mortality at  $P < 0.05$  based on the  
 179 Pearson's correlation analysis.

180

181 **Table S6. Soil chemical characteristics in soils of traditional cropping and**  
 182 **notoginseng continuous cropping**

| Treatments | pH        | Total N<br>(g kg <sup>-1</sup> ) | Olsen-P<br>(g kg <sup>-1</sup> ) | K<br>(mg kg <sup>-1</sup> ) | Organic matter<br>(g kg <sup>-1</sup> ) |
|------------|-----------|----------------------------------|----------------------------------|-----------------------------|-----------------------------------------|
| TC         | 5.86±0.11 | 1.50±0.02                        | 33.02±5.51                       | 272.08±3.96                 | 20.96±4.98                              |
| CC1        | 5.36±0.09 | 1.27±0.06                        | 48.81±2.89                       | 167.91±9.72*                | 19.87±0.56                              |
| CC2        | 5.57±0.06 | 1.13±0.01                        | 46.10±2.87                       | 351.20±18.46                | 22.63±1.38                              |
| CC3        | 5.26±0.09 | 1.50±0.06                        | 61.13±3.00*                      | 146.81±5.49*                | 32.25±2.87                              |
| RCC1       | 5.40±0.13 | 1.23±0.01                        | 51.88±2.07                       | 190.33±8.78*                | 25.42±0.88                              |
| RCC2       | 5.34±0.11 | 1.13±0.04                        | 39.50±4.98                       | 258.90±17.21                | 26.57±1.84                              |
| RCC3       | 5.65±0.01 | 1.48±0.01                        | 36.08±3.63                       | 326.15±14.10                | 29.26±0.83                              |

183 TC indicated traditional cropping (control); CC1, CC2 and CC3 indicated continuous  
 184 cropping for 1, 2 and 3 years respectively; RCC1, RCC2 and RCC3 represented  
 185 replanted continuous cropping for 1, 2 and 3 years, respectively. Data were presented  
 186 as the mean ± SE of  $n = 3$ , and asterisks indicated significant differences between the  
 187 traditional cropping and notoginseng cultivation in the soil chemical characteristics at  
 188  $P < 0.05$ .

189

190

191 **Table S7. The crops were cultivated in the notoginseng garden from 2002 to 2012**

| Cropping systems | 2002 | 2003 | 2004 | 2005 | 2006 | 2007 | 2008 | 2009 | 2010 | 2011 | 2012 |
|------------------|------|------|------|------|------|------|------|------|------|------|------|
| TC               | M    | M    | M    | M    | M    | M    | M    | M    | M    | M    | M    |
| CC1              | M    | M    | M    | M    | M    | M    | M    | M    | M    | M    | N    |
| CC2              | M    | M    | M    | M    | M    | M    | M    | M    | M    | N    | N    |
| CC3              | M    | M    | M    | M    | M    | M    | M    | M    | N    | N    | N    |
| RCC1             | M    | M    | N    | N    | N    | M    | M    | HP   | M    | M    | N    |
| RCC2             | M    | N    | N    | N    | M    | M    | HP   | M    | M    | N    | N    |
| RCC3             | N    | N    | N    | M    | M    | HP   | M    | M    | N    | N    | N    |

192

193 TC: Traditional cropping; CC1, CC2 and CC3: continuous cropping for 1, 2 and 3

194 years; RCC1, RCC2 and RCC3: replanting continuous cropping for 1, 2 and 3 years.

195 M: maize; N: notoginseng; HP: hot pepper.

196

**Table S8. The 10-bp barcodes used to tag each analyzed PCR product**

197

198

199

200

201

202

|            |            |            |
|------------|------------|------------|
| ACGTTGAATC | AGTAGTGATC | ATGTACGATG |
| ACTAGCAGTA | AGTGTATGTC | ATGTGTCTAG |
| ACTCATCTAC | AGTTCAAGTC | CAGTTCAAGT |
| ACTTGTTGAG | AGTTCTTGAC | CATACTCTAC |
| AGCTTCTTAG | ATACGACGTA | CATAGTAGTG |
| AGCTTCTTGA | ATATAGTCGC | CATTGAAGCT |
| AGTACGCTAT | ATCTACTGAC | CATTGTTAGC |

203

Bacterial and fungal products were sequenced in different runs, and these 21 barcodes

204

were used respectively for distinguishing the bacterial and fungal samples.

205

206 **References**

207

- 208 1. Wei, J.C. Fungal identification manual. Shanghai: Shanghai Scientific and  
209 Technical Publishers (1979).
- 210 2. Lin, X.M., Li, Z.Q., Wang, S.X. The characteristics of rDNA in Fungi and its  
211 using for identification of ectomycorrhizal fungi. *Acta. Agri. Boreali-occidentalis*  
212 *Sinica*. **14**,120–125 (2005).
- 213 3. He, Y.T., Yang, R.D., Zhang, G., Huang, Y.W. Identification of a  
214 cellulose-producing fungi based on 18S rDNA sequence. *Modern food Sci.*  
215 *Technol.* **24**, 638–640 (2008).
- 216 4. Abd-Elsalam, K.A., Aly, I.N., Abdel-Satar, M.A., Khalil, M.S., Verreet, J.A. PCR  
217 identification of Fusarium genus based on nuclear ribosomal-DNA sequence data.  
218 *Afr. J. Biotechnol.* **2**, 82–85 (2003).
- 219 5. Rousk, J. *et al.* Soil bacterial and fungal communities across a pH gradient in an  
220 arable soil. *ISME J.* **4**, 1–12 (2010).

221
